# Supplementary material for: Simultaneous cell disruption and semi-quantitative activity assays for high-throughput screening of thermostable L-asparaginases
Source: PubMed Central journal article supplement (PMC5962637; doi:10.1038/s41598-018-26241-7), 2018-05-21
Supplement: 41598_2018_26241_MOESM1_ESM.pdf [file 41598_2018_26241_MOESM1_ESM.pdf]

1 **Simultaneous cell disruption and semi-quantitative activity assays for high-**  
2 **throughput screening of thermostable L-asparaginases**

3 Xu Li<sup>a</sup>, Xian Zhang<sup>a\*</sup>, Shuqin Xu<sup>a</sup>, Hengwei Zhang<sup>a</sup>, Meijuan Xu<sup>a</sup>, Taowei Yang<sup>a</sup>, Li  
4 Wang<sup>b</sup>, Haifeng Qian<sup>b</sup>, Huiling Zhang<sup>c</sup>, Haitian Fang<sup>c</sup>, Tolbert Osire<sup>a</sup>, Zhiming Rao<sup>a\*</sup>,  
5 Shangtian Yang<sup>d</sup>

6 <sup>a</sup> The Key Laboratory of Industrial Biotechnology, Ministry of Education, School of  
7 Biotechnology, Jiangnan University, Wuxi 214122, China

8 <sup>b</sup> School of Food Science and Technology, Jiangnan University, Wuxi 214122, China

9 <sup>c</sup> School of Agriculture Ningxia University, Yinchuan 750021, China

10 <sup>d</sup> Department of Chemical and Biomolecular Engineering, The Ohio State University,  
11 Columbus, OH 43210, USA

12 \*Corresponding author at: The Key Laboratory of Industrial Biotechnology of Ministry  
13 of Education, School of Biotechnology, Jiangnan University, 1800 Lihu Road, Wuxi,  
14 Jiangsu 214122, China.

15 Tel: +86-510-85916881; fax: +86 510 85918516.

16 Email address: [raozhm@jiangnan.edu.cn](mailto:raozhm@jiangnan.edu.cn) (Z. Rao).

17

18 **Supplementary data**

19 **Supplementary table 1. The optimized sequence of *P. yanosii* CH1 L- asparaginase gene**

20 **for *Bacillus subtilis*.**

---

sequences

---

atgagactgctgatcctgggaatgggaggaacaatcgcaagtgtgccttcagaagaggatacgaatcatcactgtctgtggaggagatc  
ctgagactgcaggacttgagctgaagtgggaagttgaggctagagatctgctgaacatcgattctacgttgatccagcctgaggattgggt  
tctgctggctgaaacagtattcgaggcattcgaggaattgacggagtggaataaaccacggtacagacacgctcgttacacagcttcg  
atgcttagctttatggtgagaaacctcctgtgcctatcgtactcacgggagcaatgaggcctattacagagccaggtccgatgcaccaag  
gaacttatggacagctttgagattgctatcgaaggagtccaggagttacgtggcctttatggataaggtcatgctcggagtgagagtaag  
caaggctccgtgcagttggtctaacgccttcaaagcattaattatccagacatagcctatgtcaaggcaatcgattcattggaatgcaaaa  
ccgccgaaactcgaaggcgaaccggtgctcgacacgcgacatgaaccgcgtgttctgtattgcgactgttccgggtatggaaggcgat  
gtacttgaagcggccttagaattgggttatcgcggtattgccttgaaggctatgggtgggcgggattccgtatcgtggccgcgatttgctt  
gatgttgcggcgggtgcgactgaaattccggttgaatgactacacaaacattatatgacggcgttgactgaccaaatacaaaagtcggc  
cggaaagcgttagaagtcggcgtcattccggcgggggatatgactaaagaagcgaccattacgaaattaatgtggatattaggccatagc  
cgcatgtcggggaagtccggcgcttaatgtaaccaatatggtcggcgaaattgggaaatccgcgtaa

---

21

22

23 **Supplementary table 2. The character of L-asparaginases from different sources.** NR, not  
 24 reported. The  $V_{\max}$  of *Pectobacterium carotovorum* MTCC 1428 L-Asnase was 4.45U/ug.

| Strains                                            | GenBank<br>accession No. | Specific<br>activity<br>(U/mg) | Optimum<br>temperature<br>(°C) | Optimum<br>pH | $V_{\max}$<br>( uM/min ) | Km<br>(mM) | Reference                      |
|----------------------------------------------------|--------------------------|--------------------------------|--------------------------------|---------------|--------------------------|------------|--------------------------------|
| <i>Pyrococcus<br/>yayanosii</i> CH1                | WP_013906452.1           | 1483                           | 95                             | 8             | 2929                     | 6.5        | This<br>study                  |
| <i>E.coli</i>                                      | WP_000394140.1           | 105.2                          | 37                             | 7.5           | NR                       | 0.03       | Maggi et<br>al., 2017          |
| <i>B. subtilis</i> B11-<br>06                      | AGT62618.1               | 92.45                          | 40                             | 7.5           | 77.51                    | 0.43       | Jia et al.,<br>2013            |
| <i>T.gammatolerans</i><br>EJ3                      | WP_015859055.1           | 7622                           | 85                             | 8.5           | NR                       | 10         | Zuo et al.,<br>2014            |
| <i>T. zilligii</i> AN1<br>TziAN1_1                 | WP_010478656.1           | 5526                           | 90                             | 8.5           | NR                       | 6.02       | Zuo et al.,<br>2015            |
| <i>Thermococcus<br/>kodakaraensis</i><br>KOD1      | WP_011250607.1           | 2350                           | 85                             | 9.5           | 3300                     | 5.5        | Chohan<br>&<br>Rashid,<br>2013 |
| <i>Pyrococcus<br/>furius</i> DSM<br>3638           | WP_011013191.1           | 550                            | 80                             | 9             | NR                       | 12         | Bansal et<br>al., 2010         |
| <i>Pectobacterium<br/>carotovorum</i><br>MTCC 1428 | AFA36648.1               | 153.25                         | 30                             | 6.5           |                          | 0.657      | Kumar et<br>al., 2011          |
| <i>vibrio<br/>succinogenes</i>                     | WP_011138590.1           | 202                            | 37                             | 7.3           | NR                       | 0.478      | Distasio<br>et al.,<br>1976    |

25

26 **Supplementary table 3. The percentage of secondary structure in L-Asnase and its mutations.**

27 This results were calculated by Online server DICHROWEB.

|          | $\alpha$ -helix(%) | $\beta$ -sheet(%) | $\beta$ -turn(%) | random coil(%) |
|----------|--------------------|-------------------|------------------|----------------|
| L-Asnase | 42.3               | 15.4              | 17.2             | 26.0           |
| S17G     | 42.1               | 15.3              | 17.4             | 25.8           |
| A90S     | 42.3               | 15.2              | 17.0             | 26.1           |
| R156S    | 42.2               | 15.1              | 17.1             | 26.2           |
| K272A    | 42.1               | 15.5              | 17.2             | 25.9           |

28

29

30 **Supplementary table 4. The orthogonal experiments.**

| Factor        | yeast (g/L) | glycerin<br>(g/L) | NH <sub>4</sub> Cl(g/L) | corn steep<br>liquor (g/L) | activity<br>(U/mL) |
|---------------|-------------|-------------------|-------------------------|----------------------------|--------------------|
| Test 1        | 20          | 37                | 1                       | 12                         | 114.88             |
| Test 2        | 20          | 42                | 1.5                     | 15                         | 128.7              |
| Test 3        | 20          | 47                | 2                       | 18                         | 98.45              |
| Test 4        | 20          | 52                | 2.5                     | 21                         | 86.3               |
| Test 5        | 25          | 37                | 1.5                     | 18                         | 105.3              |
| Test 6        | 25          | 42                | 1                       | 21                         | 90.2               |
| Test7         | 25          | 47                | 2                       | 12                         | 134.95             |
| Test 8        | 25          | 52                | 2.5                     | 15                         | 129.45             |
| Test 9        | 30          | 37                | 2                       | 21                         | 96.3               |
| Test 10       | 30          | 42                | 2.5                     | 18                         | 107.5              |
| Test 11       | 30          | 47                | 1                       | 15                         | 149.67             |
| Test 12       | 30          | 52                | 1.5                     | 12                         | 141.18             |
| Test 13       | 35          | 37                | 2.5                     | 15                         | 134.18             |
| Test 14       | 35          | 42                | 2                       | 12                         | 138                |
| Test 15       | 35          | 47                | 1.5                     | 21                         | 108.3              |
| Test 16       | 35          | 52                | 1                       | 18                         | 119.2              |
| average value |             |                   |                         |                            |                    |
| 1             | 107.08      | 112.66            | 118.48                  | 131.10                     |                    |
| average value |             |                   |                         |                            |                    |
| 2             | 114.98      | 116.10            | 120.87                  | 136.65                     |                    |
| average value |             |                   |                         |                            |                    |
| 3             | 123.66      | 121.70            | 117.93                  | 107.62                     |                    |
| average value |             |                   |                         |                            |                    |
| 4             | 124.93      | 120.18            | 113.35                  | 95.28                      |                    |
| range         | 17.85       | 9.04              | 7.52                    | 35.82                      |                    |

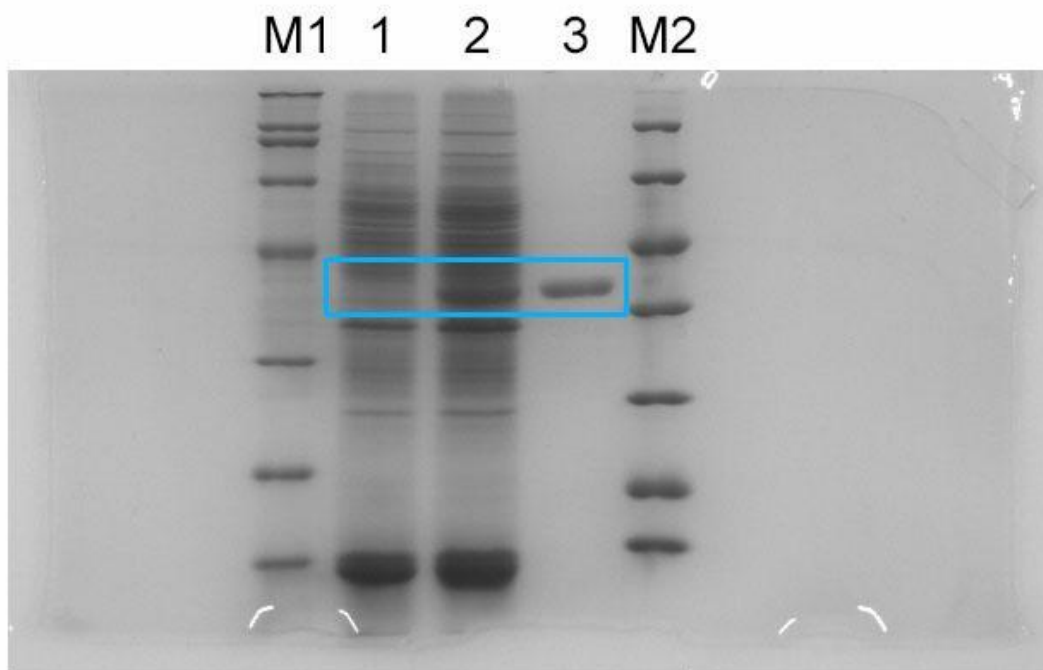

31

32 **Supplementary figure 1. SDS-PAGE analysis of L-asparaginase from *B. subtilis* 168/pMA5-**  
33 ***pyasnase*.** Lane M1, Premixed Protein Marker(Broad); Lane 1, *B. subtilis* 168/pMA5 cell extract; Lane 2,  
34 crude enzyme of *B. subtilis* 168/pMA5- *pyasnase*; Lane 3, the purified L- asparaginase; Lane M2,  
35 Unstained Protein Molecular Weight Marker.

36

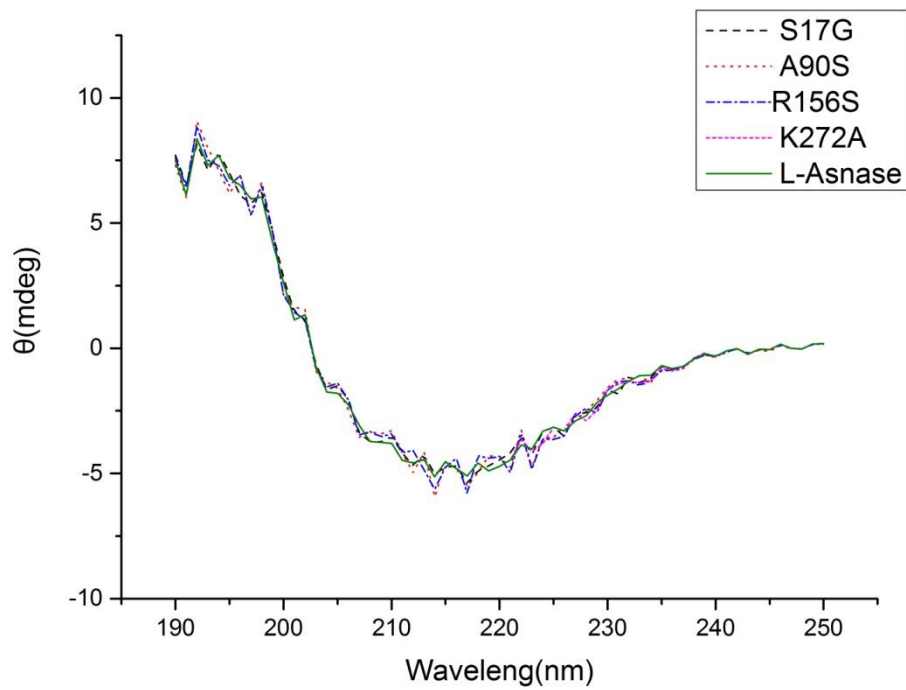

37

38 **Supplementary figure 2. CD curves of *P. yanosii* CH1 L-Asnase and its single mutations.**

39

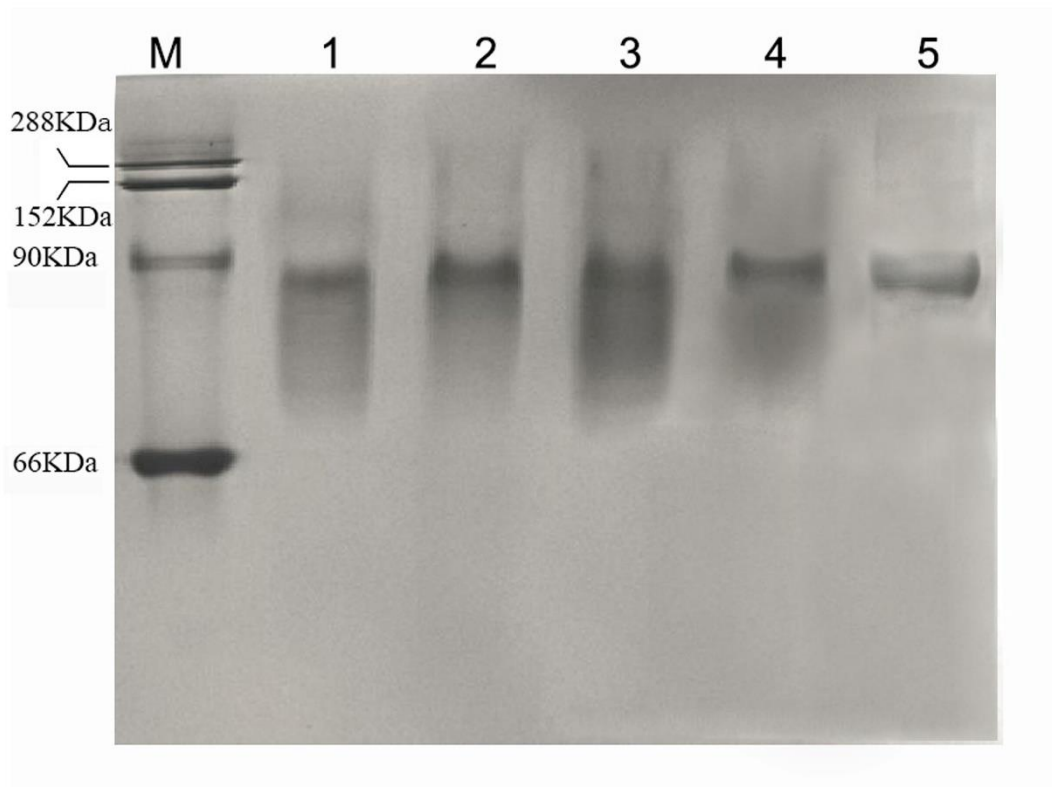

41

42 **Supplementary figure 3. Native-PAGE analysis of *P. yayanosii* CH1 L-Asnase and its single**

43 **mutations.** Lane M: Marker. the marker was prepared by our lab. From top to bottom, the proteins, which

44 were represented by the bands, were *bacillus cereus* Leucine Dehydrogenase(288kDa), *Bacillus subtilis*

45 L-asparaginase II (152kDa), *Staphylococcus aureus* lactic dehydrogenase(90kDa), bovine serum

46 albumin(66kDa). Lane 1: *P. yayanosii* CH1 L- asparaginase. Lane 2: The mutation S17G. Lane 3: The

47 mutation A90S. Lane 4: The mutation R156S. Lane 5: The mutation K272A.

48



```

1.seq  LPNITILATGGTIAGGGDSATKSNYTVGKVGVENLVNAVFPQIKDIANVKGEQVVNIGSQD      60
2.seq  .MRLIILGMGGTIAS...VPSEEGYES.SLSVVEILR.LAGLELKWEVEARDLLINIDSTL      54
Consensus  il  ggtia          y      ve      l      v      ni  s

1.seq  MNDNVVLTLLAKKINIDCDKTDGDFVITHGTDTEETAYFLDLTVKCD.KPVVMVGAMREPT      119
2.seq  IQPEDVWLLAETVFEAFEEFDGDFVITHGTDLAYTASMLSFVWRNPFVFIIVLTGAMREIT      114
Consensus  w  la          dg  vithgtdt  ta  l  v      p  v  gamrp  t

1.seq  SMSADGPEFNLYNAVVIADKASANRGVIVVMNITVLDGRDVIKTNITDVATEFKSVNYGPI      179
2.seq  EPGSDARRNLIWTLRFAIEGVF...GVYVAFMDKVMVIGVRVSRVRAVGLNAFQSIINYPDI      171
Consensus  d  p  nl  a  a          gv  v  d  v  g  v  k          f  s  ny

1.seq  GYIHNGKIDYQRTIARRHTSDTPFDVSKLNELEKVGIVYNYANASDLPAKALVDAGYDGI      239
2.seq  AYVKGNRVHWNAKFPKLEGEFVLDL...RHEERVLVLRVPGMEGDVLEAALELGYRGI      227
Consensusy  i      p  k      d      p  v          a      gy  gi

1.seq  VSAGVGVGNL.YKS..VEDTLATAAKTGTAVRSSRVFTGATTQDAEVD..DAKYGFVAS      294
2.seq  VLEGYGVGGIPYRGRDLLVVRRVATEIPVVMITQTLYDGVDLTKYKVGGRKALEVGVIPA      287
Consensusv  g  g  g  y      d      a      v      g      v      g

1.seq  GILNPQKARVLLQLAITQTKIPQQIQQIFNQY.....      326
2.seq  GDMTKEATITKIMWILGHTRIVGEVRRMLINMVGEIGKS      327
Consensusg          l  l  t  d

```

49

50 **Supplementary figure 4** Sequence alignments of *E.coil* L-asparaginase and *Pyrococcus yayanosii*

51 **CH1 L-asparaginase.** 1.seq: Sequence of *E.coil* L-asparaginase (WP\_000394140.1); 2.seq: Sequence of

52 *Pyrococcus yayanosii* CH1 L-asparaginase(WP\_013906452).

53

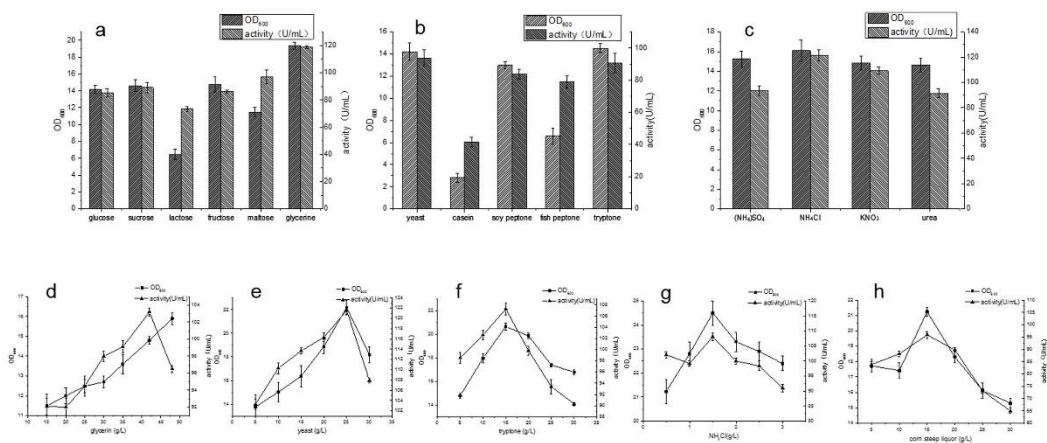

54

55 **Supplementary figure 5. The effect of carbon, nitrogen, inorganic nitrogen source and corn steep**  
 56 **liquor on the biomass and L-asparaginase activity.** a) The effect of different kind carbon source with  
 57 same concentration (35g/L) on the biomass and L-asparaginase activity. b) The effect of different kind  
 58 nitrogen source with same concentration (15g/L) on the biomass and L-asparaginase. c) The effect of  
 59 different kind inorganic nitrogen source with same concentration (0.8g/L) on the biomass and L-  
 60 asparaginase. d) The effect of glycerine at different concentration (15, 20, 25, 30, 35, 42, 48g/L) on the  
 61 biomass and L-asparaginase. e) The effect of yeast at different concentration(5-30g/L) on the biomass and  
 62 L-asparaginase. f) The effect of tryptone at different concentration(5-30g/L) on the biomass and L-  
 63 asparaginase. g) The effect of NH<sub>4</sub>Cl at different concentration(0.5-3g/L) on the biomass and L-  
 64 asparaginase. h) The effect of corn steep liquor at different concentration (5-30g/L) on the biomass and L-  
 65 asparaginase.

66
